# Supplementary material for: Ancient mtDNA from the extinct Indian cheetah supports unexpectedly deep divergence from African cheetahs
Source: PubMed Central journal article supplement (PMC7067882; doi:10.1038/s41598-020-60751-7), 2020-03-12
Supplement: 41598_2020_60751_MOESM1_ESM.pdf [file 41598_2020_60751_MOESM1_ESM.pdf]

# Ancient mtDNA from the extinct Indian cheetah supports unexpectedly deep divergence from African cheetahs

Niraj Rai, Sunil Kumar Verma, Ajay Gaur, Florin Mircea Iliescu, Mukesh Thakur, Tirupathi Rao Golla, Kailash Chandra, Satya Prakash, Wajeeda Tabasum, Sreenivas Ara, Lalji Singh, Kumarasamy Thangaraj, Guy S. Jacobs

## **Supplementary Information**

**Supplementary Figure S1.** Plot of the average mismatch against high confidence mtDNA sequences calculated in sliding windows of 1500bp. The Puma concolor sequence NC\_016470 was suggested to be impacted by a numt by Li et al. (2016), and replicating their analysis by calculating the mismatch against a higher confidence puma mtDNA sequence (KP202261) confirms this assessment. Newly generated cheetah sequences were compared to the Acinonyx jubatus mtDNA reference sequence (NC\_005212), which was confirmed to be numt-free by Li et al. Small peaks are visible in the sequences of historic samples Ind1 and Ind2 due to regions with high rates of missing data (no value is reported when less than 100 sites are called in a 1.5kb window). The highest mismatch peak among the cheetah sequences is about a quarter of the height of the NC\_016470 numt peak, indicating that our sequencing and SNP calling protocol was effective at avoiding numts.

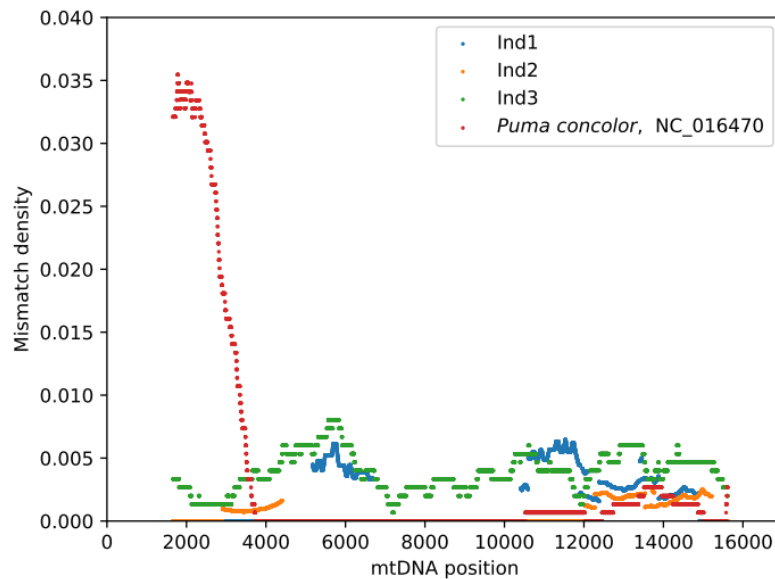

**Supplementary Figure S2.** BEAST phylogenetic tree of concatenated coding and D-loop mtDNA alignment, incorporating both full mtDNA sequences and fragments to infer subspecies divergence, see Methods and Supplementary File S2.

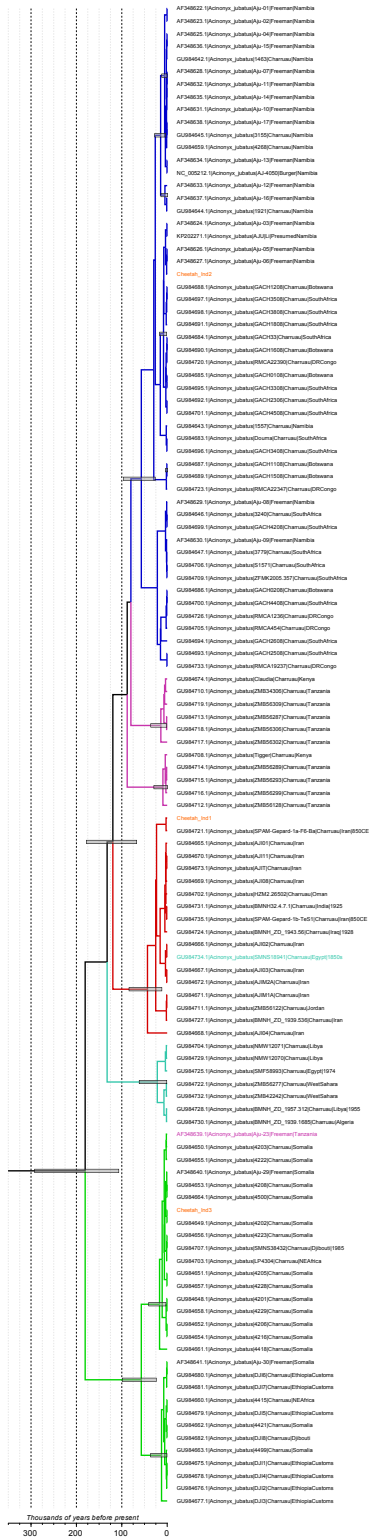

**Supplementary Table S1.** Samples used for SNP discovery (excluding MK469961-3) and exploring global diversity patterns (Main Text Figures 1 and 2B; SI Figure S2)

| Genbank ID | Species                  | Sample ID | Study                     | Sample origin         | Notes                                                                   | mtDNA classification for BEAST analysis (red - probable migrant) |
|------------|--------------------------|-----------|---------------------------|-----------------------|-------------------------------------------------------------------------|------------------------------------------------------------------|
| NC_028311  | <i>Puma yagouaroundi</i> | HJA       | Li <i>et al</i> 2016      |                       |                                                                         | <i>P. yagouaroundi</i>                                           |
| NC_016470  | <i>Puma concolor</i>     | PC110509  | Unpublished               |                       | Sequence incorporating numts not used. KP202261 used in other analyses. | <i>P. concolor</i>                                               |
| NC_005212  | <i>Acinonyx jubatus</i>  | AJ-4050   | Burger                    | Namibia               |                                                                         | <i>A. j. jubatus</i>                                             |
| KP202271   | <i>Acinonyx jubatus</i>  | AJU       | Li <i>et al</i> 2016      |                       |                                                                         | <i>A. j. jubatus</i>                                             |
| MK469963   | <i>Acinonyx jubatus</i>  | Ind1      | <i>This study</i>         | Madhya Pradesh, India | Early 19th century                                                      | <i>A. j. venaticus</i>                                           |
| MK469962   | <i>Acinonyx jubatus</i>  | Ind2      | <i>This study</i>         | India                 | 1850-1900                                                               | <i>A. j. jubatus</i>                                             |
| MK469961   | <i>Acinonyx jubatus</i>  | Ind3      | <i>This study</i>         | India                 |                                                                         | <i>A. j. soemmeringii</i>                                        |
| AF348641   | <i>Acinonyx jubatus</i>  | Aju-30    | Freeman <i>et al</i> 2001 | Somalia               |                                                                         | <i>A. j. soemmeringii</i>                                        |
| AF348640   | <i>Acinonyx jubatus</i>  | Aju-29    | Freeman <i>et al</i> 2001 | Somalia               |                                                                         | <i>A. j. soemmeringii</i>                                        |
| AF348639   | <i>Acinonyx jubatus</i>  | Aju-23    | Freeman <i>et al</i> 2001 | Tanzania              |                                                                         | <i>A. j. soemmeringii</i>                                        |
| AF348638   | <i>Acinonyx jubatus</i>  | Aju-17    | Freeman <i>et al</i> 2001 | Namibia               |                                                                         | <i>A. j. jubatus</i>                                             |
| AF348637   | <i>Acinonyx jubatus</i>  | Aju-16    | Freeman <i>et al</i> 2001 | Namibia               |                                                                         | <i>A. j. jubatus</i>                                             |
| AF348636   | <i>Acinonyx jubatus</i>  | Aju-15    | Freeman <i>et al</i> 2001 | Namibia               |                                                                         | <i>A. j. jubatus</i>                                             |
| AF348635   | <i>Acinonyx jubatus</i>  | Aju-14    | Freeman <i>et al</i> 2001 | Namibia               |                                                                         | <i>A. j. jubatus</i>                                             |
| AF348634   | <i>Acinonyx jubatus</i>  | Aju-13    | Freeman <i>et al</i> 2001 | Namibia               |                                                                         | <i>A. j. jubatus</i>                                             |
| AF348633   | <i>Acinonyx jubatus</i>  | Aju-12    | Freeman <i>et al</i> 2001 | Namibia               |                                                                         | <i>A. j. jubatus</i>                                             |
| AF348632   | <i>Acinonyx jubatus</i>  | Aju-11    | Freeman <i>et al</i> 2001 | Namibia               |                                                                         | <i>A. j. jubatus</i>                                             |
| AF348631   | <i>Acinonyx jubatus</i>  | Aju-10    | Freeman <i>et al</i> 2001 | Namibia               |                                                                         | <i>A. j. jubatus</i>                                             |
| AF348630   | <i>Acinonyx jubatus</i>  | Aju-09    | Freeman <i>et al</i> 2001 | Namibia               |                                                                         | <i>A. j. jubatus</i>                                             |
| AF348629   | <i>Acinonyx jubatus</i>  | Aju-08    | Freeman <i>et al</i> 2001 | Namibia               |                                                                         | <i>A. j. jubatus</i>                                             |
| AF348628   | <i>Acinonyx jubatus</i>  | Aju-07    | Freeman <i>et al</i> 2001 | Namibia               |                                                                         | <i>A. j. jubatus</i>                                             |
| AF348627   | <i>Acinonyx jubatus</i>  | Aju-06    | Freeman <i>et al</i> 2001 | Namibia               |                                                                         | <i>A. j. jubatus</i>                                             |
| AF348626   | <i>Acinonyx jubatus</i>  | Aju-05    | Freeman <i>et al</i> 2001 | Namibia               |                                                                         | <i>A. j. jubatus</i>                                             |

|          |                         |                  |                            |                  |       |                           |
|----------|-------------------------|------------------|----------------------------|------------------|-------|---------------------------|
| AF348625 | <i>Acinonyx jubatus</i> | Aju-04           | Freeman <i>et al</i> 2001  | Namibia          |       | <i>A. j. jubatus</i>      |
| AF348624 | <i>Acinonyx jubatus</i> | Aju-03           | Freeman <i>et al</i> 2001  | Namibia          |       | <i>A. j. jubatus</i>      |
| AF348623 | <i>Acinonyx jubatus</i> | Aju-02           | Freeman <i>et al</i> 2001  | Namibia          |       | <i>A. j. jubatus</i>      |
| AF348622 | <i>Acinonyx jubatus</i> | Aju-01           | Freeman <i>et al</i> 2001  | Namibia          |       | <i>A. j. jubatus</i>      |
| GU984719 | <i>Acinonyx jubatus</i> | ZMB56309         | Charruau <i>et al</i> 2011 | Tanzania         |       | <i>A. j. raineyi</i>      |
| GU984718 | <i>Acinonyx jubatus</i> | ZMB56306         | Charruau <i>et al</i> 2011 | Tanzania         |       | <i>A. j. raineyi</i>      |
| GU984717 | <i>Acinonyx jubatus</i> | ZMB56302         | Charruau <i>et al</i> 2011 | Tanzania         |       | <i>A. j. raineyi</i>      |
| GU984716 | <i>Acinonyx jubatus</i> | ZMB56299         | Charruau <i>et al</i> 2011 | Tanzania         |       | <i>A. j. raineyi</i>      |
| GU984715 | <i>Acinonyx jubatus</i> | ZMB56293         | Charruau <i>et al</i> 2011 | Tanzania         |       | <i>A. j. raineyi</i>      |
| GU984714 | <i>Acinonyx jubatus</i> | ZMB56289         | Charruau <i>et al</i> 2011 | Tanzania         |       | <i>A. j. raineyi</i>      |
| GU984713 | <i>Acinonyx jubatus</i> | ZMB56287         | Charruau <i>et al</i> 2011 | Tanzania         |       | <i>A. j. raineyi</i>      |
| GU984712 | <i>Acinonyx jubatus</i> | ZMB56128         | Charruau <i>et al</i> 2011 | Tanzania         |       | <i>A. j. raineyi</i>      |
| GU984711 | <i>Acinonyx jubatus</i> | ZMB56122         | Charruau <i>et al</i> 2011 | Jordan           |       | <i>A. j. venaticus</i>    |
| GU984710 | <i>Acinonyx jubatus</i> | ZMB34306         | Charruau <i>et al</i> 2011 | Tanzania         |       | <i>A. j. raineyi</i>      |
| GU984709 | <i>Acinonyx jubatus</i> | ZFMK2005.3<br>57 | Charruau <i>et al</i> 2011 | South Africa     |       | <i>A. j. jubatus</i>      |
| GU984708 | <i>Acinonyx jubatus</i> | Tigger           | Charruau <i>et al</i> 2011 | Kenya            |       | <i>A. j. raineyi</i>      |
| GU984707 | <i>Acinonyx jubatus</i> | SMNS38432        | Charruau <i>et al</i> 2011 | Djibouti         | <1985 | <i>A. j. soemmeringii</i> |
| GU984706 | <i>Acinonyx jubatus</i> | S1571            | Charruau <i>et al</i> 2011 | South Africa     |       | <i>A. j. jubatus</i>      |
| GU984705 | <i>Acinonyx jubatus</i> | RMCA454          | Charruau <i>et al</i> 2011 | DR Congo         |       | <i>A. j. jubatus</i>      |
| GU984704 | <i>Acinonyx jubatus</i> | NMW12071         | Charruau <i>et al</i> 2011 | Libya            |       | <i>North African</i>      |
| GU984703 | <i>Acinonyx jubatus</i> | LP4304           | Charruau <i>et al</i> 2011 | Northeast Africa |       | <i>A. j. soemmeringii</i> |
| GU984702 | <i>Acinonyx jubatus</i> | HZM2.26502       | Charruau <i>et al</i> 2011 | Oman             | 1977  | <i>A. j. venaticus</i>    |
| GU984701 | <i>Acinonyx jubatus</i> | GACH4508         | Charruau <i>et al</i> 2011 | South Africa     |       | <i>A. j. jubatus</i>      |
| GU984700 | <i>Acinonyx jubatus</i> | GACH4408         | Charruau <i>et al</i> 2011 | South Africa     |       | <i>A. j. jubatus</i>      |
| GU984699 | <i>Acinonyx jubatus</i> | GACH4208         | Charruau <i>et al</i> 2011 | South Africa     |       | <i>A. j. jubatus</i>      |
| GU984698 | <i>Acinonyx jubatus</i> | GACH3808         | Charruau <i>et al</i> 2011 | South Africa     |       | <i>A. j. jubatus</i>      |
| GU984697 | <i>Acinonyx jubatus</i> | GACH3508         | Charruau <i>et al</i> 2011 | South Africa     |       | <i>A. j. jubatus</i>      |
| GU984696 | <i>Acinonyx jubatus</i> | GACH3408         | Charruau <i>et al</i> 2011 | South Africa     |       | <i>A. j. jubatus</i>      |
| GU984695 | <i>Acinonyx jubatus</i> | GACH3308         | Charruau <i>et al</i> 2011 | South Africa     |       | <i>A. j. jubatus</i>      |
| GU984694 | <i>Acinonyx jubatus</i> | GACH2608         | Charruau <i>et al</i> 2011 | South Africa     |       | <i>A. j. jubatus</i>      |
| GU984693 | <i>Acinonyx jubatus</i> | GACH2508         | Charruau <i>et al</i> 2011 | South Africa     |       | <i>A. j. jubatus</i>      |
| GU984692 | <i>Acinonyx jubatus</i> | GACH2306         | Charruau <i>et al</i> 2011 | South Africa     |       | <i>A. j. jubatus</i>      |
| GU984691 | <i>Acinonyx jubatus</i> | GACH1808         | Charruau <i>et al</i> 2011 | South Africa     |       | <i>A. j. jubatus</i>      |
| GU984690 | <i>Acinonyx jubatus</i> | GACH1608         | Charruau <i>et al</i> 2011 | Botswana         |       | <i>A. j. jubatus</i>      |
| GU984689 | <i>Acinonyx jubatus</i> | GACH1508         | Charruau <i>et al</i> 2011 | Botswana         |       | <i>A. j. jubatus</i>      |
| GU984688 | <i>Acinonyx jubatus</i> | GACH1208         | Charruau <i>et al</i> 2011 | Botswana         |       | <i>A. j. jubatus</i>      |
| GU984687 | <i>Acinonyx jubatus</i> | GACH1108         | Charruau <i>et al</i> 2011 | Botswana         |       | <i>A. j. jubatus</i>      |
| GU984686 | <i>Acinonyx jubatus</i> | GACH0208         | Charruau <i>et al</i> 2011 | Botswana         |       | <i>A. j. jubatus</i>      |

|          |                         |          |                            |                                |  |                           |
|----------|-------------------------|----------|----------------------------|--------------------------------|--|---------------------------|
| GU984685 | <i>Acinonyx jubatus</i> | GACH0108 | Charruau <i>et al</i> 2011 | Botswana                       |  | <i>A. j. jubatus</i>      |
| GU984684 | <i>Acinonyx jubatus</i> | GACH33   | Charruau <i>et al</i> 2011 | South Africa                   |  | <i>A. j. jubatus</i>      |
| GU984683 | <i>Acinonyx jubatus</i> | Douma    | Charruau <i>et al</i> 2011 | South Africa                   |  | <i>A. j. jubatus</i>      |
| GU984682 | <i>Acinonyx jubatus</i> | DJI8     | Charruau <i>et al</i> 2011 | Djibouti                       |  | <i>A. j. soemmeringii</i> |
| GU984681 | <i>Acinonyx jubatus</i> | DJI7     | Charruau <i>et al</i> 2011 | Ethiopia<br>Customs<br>Seizure |  | <i>A. j. soemmeringii</i> |
| GU984680 | <i>Acinonyx jubatus</i> | DJI6     | Charruau <i>et al</i> 2011 | Ethiopia<br>Customs<br>Seizure |  | <i>A. j. soemmeringii</i> |
| GU984679 | <i>Acinonyx jubatus</i> | DJI5     | Charruau <i>et al</i> 2011 | Ethiopia<br>Customs<br>Seizure |  | <i>A. j. soemmeringii</i> |
| GU984678 | <i>Acinonyx jubatus</i> | DJI4     | Charruau <i>et al</i> 2011 | Ethiopia<br>Customs<br>Seizure |  | <i>A. j. soemmeringii</i> |
| GU984677 | <i>Acinonyx jubatus</i> | DJI3     | Charruau <i>et al</i> 2011 | Ethiopia<br>Customs<br>Seizure |  | <i>A. j. soemmeringii</i> |
| GU984676 | <i>Acinonyx jubatus</i> | DJI2     | Charruau <i>et al</i> 2011 | Ethiopia<br>Customs<br>Seizure |  | <i>A. j. soemmeringii</i> |
| GU984675 | <i>Acinonyx jubatus</i> | DJI1     | Charruau <i>et al</i> 2011 | Ethiopia<br>Customs<br>Seizure |  | <i>A. j. soemmeringii</i> |
| GU984674 | <i>Acinonyx jubatus</i> | Claudia  | Charruau <i>et al</i> 2011 | Kenya                          |  | <i>A. j. raineyi</i>      |
| GU984673 | <i>Acinonyx jubatus</i> | AJIT     | Charruau <i>et al</i> 2011 | Iran                           |  | <i>A. j. venaticus</i>    |
| GU984672 | <i>Acinonyx jubatus</i> | AJIM2A   | Charruau <i>et al</i> 2011 | Iran                           |  | <i>A. j. venaticus</i>    |
| GU984671 | <i>Acinonyx jubatus</i> | AJIM1A   | Charruau <i>et al</i> 2011 | Iran                           |  | <i>A. j. venaticus</i>    |
| GU984670 | <i>Acinonyx jubatus</i> | AJI11    | Charruau <i>et al</i> 2011 | Iran                           |  | <i>A. j. venaticus</i>    |
| GU984669 | <i>Acinonyx jubatus</i> | AJI08    | Charruau <i>et al</i> 2011 | Iran                           |  | <i>A. j. venaticus</i>    |
| GU984668 | <i>Acinonyx jubatus</i> | AJI04    | Charruau <i>et al</i> 2011 | Iran                           |  | <i>A. j. venaticus</i>    |
| GU984667 | <i>Acinonyx jubatus</i> | AJI03    | Charruau <i>et al</i> 2011 | Iran                           |  | <i>A. j. venaticus</i>    |
| GU984666 | <i>Acinonyx jubatus</i> | AJI02    | Charruau <i>et al</i> 2011 | Iran                           |  | <i>A. j. venaticus</i>    |
| GU984665 | <i>Acinonyx jubatus</i> | AJI01    | Charruau <i>et al</i> 2011 | Iran                           |  | <i>A. j. venaticus</i>    |
| GU984664 | <i>Acinonyx jubatus</i> | 4500     | Charruau <i>et al</i> 2011 | Somalia                        |  | <i>A. j. soemmeringii</i> |
| GU984663 | <i>Acinonyx jubatus</i> | 4499     | Charruau <i>et al</i> 2011 | Somalia                        |  | <i>A. j. soemmeringii</i> |
| GU984662 | <i>Acinonyx jubatus</i> | 4421     | Charruau <i>et al</i> 2011 | Somalia                        |  | <i>A. j. soemmeringii</i> |
| GU984661 | <i>Acinonyx jubatus</i> | 4418     | Charruau <i>et al</i> 2011 | Somalia                        |  | <i>A. j. soemmeringii</i> |
| GU984660 | <i>Acinonyx jubatus</i> | 4415     | Charruau <i>et al</i> 2011 | Northeast<br>Africa            |  | <i>A. j. soemmeringii</i> |
| GU984659 | <i>Acinonyx jubatus</i> | 4268     | Charruau <i>et al</i> 2011 | Namibia                        |  | <i>A. j. jubatus</i>      |

|          |                         |                     |                            |              |           |                           |
|----------|-------------------------|---------------------|----------------------------|--------------|-----------|---------------------------|
| GU984658 | <i>Acinonyx jubatus</i> | 4229                | Charruau <i>et al</i> 2011 | Somalia      |           | <i>A. j. soemmeringii</i> |
| GU984657 | <i>Acinonyx jubatus</i> | 4228                | Charruau <i>et al</i> 2011 | Somalia      |           | <i>A. j. soemmeringii</i> |
| GU984656 | <i>Acinonyx jubatus</i> | 4223                | Charruau <i>et al</i> 2011 | Somalia      |           | <i>A. j. soemmeringii</i> |
| GU984655 | <i>Acinonyx jubatus</i> | 4222                | Charruau <i>et al</i> 2011 | Somalia      |           | <i>A. j. soemmeringii</i> |
| GU984654 | <i>Acinonyx jubatus</i> | 4216                | Charruau <i>et al</i> 2011 | Somalia      |           | <i>A. j. soemmeringii</i> |
| GU984653 | <i>Acinonyx jubatus</i> | 4208                | Charruau <i>et al</i> 2011 | Somalia      |           | <i>A. j. soemmeringii</i> |
| GU984652 | <i>Acinonyx jubatus</i> | 4206                | Charruau <i>et al</i> 2011 | Somalia      |           | <i>A. j. soemmeringii</i> |
| GU984651 | <i>Acinonyx jubatus</i> | 4205                | Charruau <i>et al</i> 2011 | Somalia      |           | <i>A. j. soemmeringii</i> |
| GU984650 | <i>Acinonyx jubatus</i> | 4203                | Charruau <i>et al</i> 2011 | Somalia      |           | <i>A. j. soemmeringii</i> |
| GU984649 | <i>Acinonyx jubatus</i> | 4202                | Charruau <i>et al</i> 2011 | Somalia      |           | <i>A. j. soemmeringii</i> |
| GU984648 | <i>Acinonyx jubatus</i> | 4201                | Charruau <i>et al</i> 2011 | Somalia      |           | <i>A. j. soemmeringii</i> |
| GU984647 | <i>Acinonyx jubatus</i> | 3779                | Charruau <i>et al</i> 2011 | South Africa |           | <i>A. j. jubatus</i>      |
| GU984646 | <i>Acinonyx jubatus</i> | 3240                | Charruau <i>et al</i> 2011 | South Africa |           | <i>A. j. jubatus</i>      |
| GU984645 | <i>Acinonyx jubatus</i> | 3155                | Charruau <i>et al</i> 2011 | Namibia      |           | <i>A. j. jubatus</i>      |
| GU984644 | <i>Acinonyx jubatus</i> | 1921                | Charruau <i>et al</i> 2011 | Namibia      |           | <i>A. j. jubatus</i>      |
| GU984643 | <i>Acinonyx jubatus</i> | 1557                | Charruau <i>et al</i> 2011 | Namibia      |           | <i>A. j. jubatus</i>      |
| GU984642 | <i>Acinonyx jubatus</i> | 1463                | Charruau <i>et al</i> 2011 | Namibia      |           | <i>A. j. jubatus</i>      |
| GU984735 | <i>Acinonyx jubatus</i> | SPAM-Gepard-1b-TeS1 | Charruau <i>et al</i> 2011 | Iran         | 800-900CE | <i>A. j. venaticus</i>    |
| GU984734 | <i>Acinonyx jubatus</i> | SMNS18941           | Charruau <i>et al</i> 2011 | Egypt        | 1850s     | <i>A. j. venaticus</i>    |
| GU984733 | <i>Acinonyx jubatus</i> | RMCA19237           | Charruau <i>et al</i> 2011 | DR Congo     |           | <i>A. j. jubatus</i>      |
| GU984732 | <i>Acinonyx jubatus</i> | ZMB42242            | Charruau <i>et al</i> 2011 | West Sahara  |           | <i>North African</i>      |
| GU984731 | <i>Acinonyx jubatus</i> | BMNH32.4.7.1        | Charruau <i>et al</i> 2011 | India        | 1925      | <i>A. j. venaticus</i>    |
| GU984730 | <i>Acinonyx jubatus</i> | BMNH_ZD_1 939.1685  | Charruau <i>et al</i> 2011 | Algeria      | 1939      | <i>North African</i>      |
| GU984729 | <i>Acinonyx jubatus</i> | NMW12070            | Charruau <i>et al</i> 2011 | Libya        |           | <i>North African</i>      |
| GU984728 | <i>Acinonyx jubatus</i> | BMNH_ZD_1 957.312   | Charruau <i>et al</i> 2011 | Libya        | 1955      | <i>North African</i>      |
| GU984727 | <i>Acinonyx jubatus</i> | BMNH_ZD_1 939.536   | Charruau <i>et al</i> 2011 | Iran         |           | <i>A. j. venaticus</i>    |
| GU984726 | <i>Acinonyx jubatus</i> | RMCA1236            | Charruau <i>et al</i> 2011 | DR Congo     |           | <i>A. j. jubatus</i>      |
| GU984725 | <i>Acinonyx jubatus</i> | SMF58993            | Charruau <i>et al</i> 2011 | Egypt        | 1974      | <i>North African</i>      |

|          |                         |                              |                            |             |           |                        |
|----------|-------------------------|------------------------------|----------------------------|-------------|-----------|------------------------|
| GU984724 | <i>Acinonyx jubatus</i> | BMNH_ZD_1<br>943.56          | Charruau <i>et al</i> 2011 | Iraq        | 1928      | <i>A. j. venaticus</i> |
| GU984723 | <i>Acinonyx jubatus</i> | RMCA22347                    | Charruau <i>et al</i> 2011 | DR Congo    |           | <i>A. j. jubatus</i>   |
| GU984722 | <i>Acinonyx jubatus</i> | ZMB56277                     | Charruau <i>et al</i> 2011 | West Sahara |           | <i>North African</i>   |
| GU984721 | <i>Acinonyx jubatus</i> | SPAM-<br>Gepard-1a-<br>F6-Ba | Charruau <i>et al</i> 2011 | Iran        | 800-900CE | <i>A. j. venaticus</i> |
| GU984720 | <i>Acinonyx jubatus</i> | RMCA22390                    | Charruau <i>et al</i> 2011 | DR Congo    |           | <i>A. j. jubatus</i>   |



**Supplementary Table S2.** Primers used for Long Range PCR.

|                | <b>Forward Primer sequence<br/>(5'-&gt;3')</b> | <b>Reverse Primer (5'-&gt;3')</b> | <b>Amplicon Length</b> | <b>Nucleotide Positions</b> | <b>Tm (Forward Primer)</b> | <b>Tm (Reverse Primer)</b> | <b>Annealing Temp. °c</b> | <b>Concentration of PCR product in Nanogram</b> |
|----------------|------------------------------------------------|-----------------------------------|------------------------|-----------------------------|----------------------------|----------------------------|---------------------------|-------------------------------------------------|
| Primer Pair 01 | ATACCCATACTGTGCTTGCCC                          | AGTACCGGCTCATAGGGGATA             | 9839                   | 146-9984                    | 60.13                      | 59.89                      | 58                        | 200 ng/ul                                       |
| Primer Pair 02 | ACCGACTGATTAATAACCGCCT                         | AGTCATAGCAAGTTCGACCCC             | 8195                   | 9752- 17946                 | 59.57                      | 59.79                      | 60                        | 50ng/ul                                         |
| Primer Pair 03 | CCGACTGATTAATAACCGCCT                          | GTCATAGCAAGTTCGACCCC              | 8193                   | 9753-17945                  | 57.89                      | 58.35                      | 58                        | 60ng/ul                                         |
| Primer Pair 04 | AACCGACTGATTAATAACCGCCT                        | GTGGAGACCCCGCATAGAG               | 8269                   | 9751-18019                  | 60.12                      | 59.26                      | 58                        | 90ng/ul                                         |

**Supplementary Table S3.** Relative support (bp-RELL) of the 10 most supported tree topologies and divergence dates supported by each topology.

| Tree topology                       | bp-RELL | Divergence (Indian and NE Africa, ky) |       | Divergence (Indian and SE Africa, ky) |       |      |
|-------------------------------------|---------|---------------------------------------|-------|---------------------------------------|-------|------|
|                                     |         | ML                                    | SD    | ML                                    | SD    |      |
| ((PC,PY),(I3,(I1,(AJ1,(I2,AJ2)))))  | 0.355   |                                       | 140.5 | 18.0                                  | 74.3  | 23.7 |
| ((PC,PY),(I3,(I1,(AJ2,(I2,AJ1)))))  | 0.156   |                                       | 138.9 | 17.7                                  | 87.6  | 25.0 |
| ((PC,PY),((I1,I3),(AJ1,(I2,AJ2))))) | 0.118   |                                       | 129.9 | 26.3                                  | 130.6 | 16.6 |
| ((PC,PY),(I1,(I3,(AJ1,(I2,AJ2)))))  | 0.081   |                                       | 130.5 | 47.3                                  | 130.5 | 47.3 |
| ((PC,PY),((I1,I3),(AJ2,(I2,AJ1))))) | 0.075   |                                       | 128.6 | 26.7                                  | 131.2 | 16.7 |
| ((PC,PY),(AJ1,((I2,AJ2),(I1,I3))))) | 0.046   |                                       | 65.1  | 13.4                                  | 88.2  | 11.3 |
| ((PC,PY),(I1,(I3,(AJ2,(I2,AJ1)))))  | 0.036   |                                       | 130.9 | 47.3                                  | 130.9 | 47.3 |
| ((PC,PY),(AJ1,(I2,(AJ2,(I1,I3)))))  | 0.034   |                                       | 57.4  | 11.8                                  | 81.1  | 10.0 |
| ((PC,PY),(I3,((I2,AJ2),(I1,AJ1))))) | 0.017   |                                       | 145.5 | 19.0                                  | 32.6  | 12.2 |
| ((PC,PY),(I3,(AJ1,(I1,(AJ2,I3)))))  | 0.014   |                                       | 145.5 | 20.1                                  | 32.6  | 17.0 |

| Topology key |                            |
|--------------|----------------------------|
| PC           | Puma_concolor_KP202261     |
| PY           | Puma_yagouarondi_NC_028311 |
| I3           | Ind3_HyderabadZoo          |
| I2           | Ind2_Mysore                |
| I1           | Ind1                       |
| AJ1          | Acinonyx_jubatus_NC_005212 |
| AJ2          | Acinonyx_jubatus_KP202271  |

**Supplementary Table S4.** Multiplex PCR primers used for amplicon sequencing.

| Sequence Range | Primer ID | 1st-PCR                        | 2nd-PCR                          | Product Length |
|----------------|-----------|--------------------------------|----------------------------------|----------------|
| 175- 275       | rs201     | ACGTTGGATGTGTACGCGTATACGTGGGTG | ACGTTGGATGACAGTCAAGGTGCTATTCAG   | 101            |
| 675-740        | rs701     | ACGTTGGATGGGCCTTATGTTTAGGTACGG | ACGTTGGATGCGTGTCTATTTATGTCCTGC   | 66             |
| 757- 859       | rs701     | ACGTTGGATGGGCCTTATGTTTAGGTACGG | ACGTTGGATGTACCAATCCCCTATCATCGC   | 103            |
| 1152- 1233     | rs1101    | ACGTTGGATGGGTCTAGCCTTCCATTAG   | ACGTTGGATGTTAATCGTATGACCGCGGTG   | 82             |
| 1672- 1750     | rs1501    | ACGTTGGATGACTGCACGATAGCTAAGACC | ACGTTGGATGTTCTGGGTGTAAGCCAGATG   | 79             |
| 2851- 2923     | rs2701    | ACGTTGGATGCATGCCTGTGTTGGATTAAC | ACGTTGGATGTAATTGACCCAAAGAGACCC   | 73             |
| 3070- 3150     | rs2901    | ACGTTGGATGGATTATGCTACCTTTGCACG | ACGTTGGATGGATGTCCTGATCCAACATCG   | 81             |
| 3260- 3335     | rs3101    | ACGTTGGATGCCCAACCTAAATTGTTGGC  | ACGTTGGATGAAGGCCCACTTCATCAAAGC   | 76             |
| 4460- 4540     | rs4301    | ACGTTGGATGTGGCGTATTCTGCTAGAAAG | ACGTTGGATGGGTGTAGTAATGGTAGCACG   | 81             |
| 4640- 4730     | rs4501    | ACGTTGGATGAAAGCTAGGGTAAGAGGGAG | ACGTTGGATGTAGGAATGATGGCTAGTAGG   | 91             |
| 4865- 4930     | rs4701    | ACGTTGGATGACATAGAGGTTTAAATCCCC | ACGTTGGATGGTACTCAGAAGTGAAAGGG    | 66             |
| 5481- 5536     | rs5301    | ACGTTGGATGCGTAGTTGTGTTTGGTTGAG | ACGTTGGATGGTTGAGGGAAATATGGTTAG   | 56             |
| 5865- 5950     | rs5701    | ACGTTGGATGTAGCCATAACAGCACTACTC | ACGTTGGATGCTGGCTTCAATCCACTTCTC   | 86             |
| 6660- 6740     | rs6501    | ACGTTGGATGAAGAAAGAGGGAGGAAGGAG | ACGTTGGATGACTCCCAGTTTTAGCAGCAG   | 81             |
| 6910- 6990     | rs6901    | ACGTTGGATGTAAGATAGGATCTCCTCCTC | ACGTTGGATGTATGCTCGTGTGTCTACGTC   | 81             |
| 7248- 7330     | rs7201    | ACGTTGGATGATCAATTGGCTTCTGGGCT  | ACGTTGGATGGGGCAAAAATTCACTTCACG   | 83             |
| 7465- 7545     | rs7301    | ACGTTGGATGTCTAGTGAAGAGTTAGCCAG | ACGTTGGATGTTGCATCCAAGCGAGAAGTG   | 81             |
| 7670- 7695     | rs7501    | ACGTTGGATGTTCCAGATAGGCCTAGGAAG | ACGTTGGATGTTGCATCCAAGCGAGAAGTG   | 26             |
| 9240- 9330     | rs9101    | ACGTTGGATGAGCTCTAATACTGATGTCCC | ACGTTGGATGTGGTTTTGGTGGGTCATTAG   | 91             |
| 10268- 10375   | rs10101   | ACGTTGGATGTAGTCCGTGGAATCCTGTAG | ACGTTGGATGACGCAGAAAAAGTAAGCCCC   | 108            |
| 10680- 10781   | rs10501   | ACGTTGGATGTCATGAAAAGGGCAAACGG  | ACGTTGGATGGATTGTTTCAGGACTACTATCG | 102            |
| 11071- 11170   | rs10901   | ACGTTGGATGCCCACTAATGTCTTCTCTC  | ACGTTGGATGTTCTCAGACTCACTCTCTGC   | 100            |
| 11250- 11335   | rs11101   | ACGTTGGATGCCTCCTACAATGCTAAAAA  | ACGTTGGATGATAGGAAATACAGGCCAGCG   | 86             |
| 12448- 12545   | rs12301   | ACGTTGGATGCTCGTTGGGTTGTAATGAGT | ACGTTGGATGTGCTAATTCATGCCTCCACG   | 98             |
| 12546- 12629   | rs12501   | ACGTTGGATGGTCTTGCATACTTTTTCGG  | ACGTTGGATGGTTCCTTTATATAATCGGG    | 84             |
| 12641- 12720   | rs12601   | ACGTTGGATGTTTGGTTCCTAAGCCAATG  | ACGTTGGATGTGCTAATTCATGCCTCCACG   | 80             |

|              |         |                                |                                |     |
|--------------|---------|--------------------------------|--------------------------------|-----|
| 12769- 12847 | rs12701 | ACGTTGGATGGGAGACCTAGAATGTCCTTG | ACGTTGGATGGTAACAAATAGTGCTACGGG | 79  |
| 12770- 12850 | rs12701 | ACGTTGGATGGGAGACCTAGAATGTCCTTG | ACGTTGGATGGTAACAAATAGTGCTACGGG | 81  |
| 12870- 12940 | rs12801 | ACGTTGGATGGAGATGACTGTTTCCTGTCC | ACGTTGGATGGATATATACTCAGATCC    | 71  |
| 12972- 13074 | rs12901 | ACGTTGGATGCCAAACCCTAATCTATCAC  | ACGTTGGATGAAATTGGTAAGGAACCATGC | 103 |
| 13054- 13142 | rs13001 | ACGTTGGATGGGTTGTTGGCGTTACTAGG  | ACGTTGGATGAAATTGGTAAGGAACCATGC | 89  |
| 13353- 13445 | rs13301 | ACGTTGGATGCCCAACATGACAACCTAAAC | ACGTTGGATGTACAAACCCTCACCTATGC  | 93  |
| 13475- 13552 | rs13401 | ACGTTGGATGCTACCATCAGCCATAGAAGG | ACGTTGGATGCTTCTCAACCTCAAGCCAAC | 78  |
| 14031- 14123 | rs14001 | ACGTTGGATGTATCCTGCAAAGATACTTCC | ACGTTGGATGCGATTCAACGCCTTGAATCC | 93  |
| 14510- 14530 | rs14501 | ACGTTGGATGAATCACCCCTAACCTTAGCC | ACGTTGGATGCTCCTCACTAAAAACCCCG  | 21  |
| 15253- 15327 | rs15101 | ACGTTGGATGGAGCCGAAGTTTCATCATGC | ACGTTGGATGGCCGATGTAAGGAATTGCTG | 75  |
| 15670- 15760 | rs15501 | ACGTTGGATGGGATATGTCTTACCATGAGG | ACGTTGGATGTCTCCCCATATTAACCCG   | 91  |
| 15851- 15945 | rs15701 | ACGTTGGATGGGAGACCTAGAATGTCCTTG | ACGTTGGATGCACCCTAACATGAATTGGCG | 95  |
| 16061- 16130 | rs15901 | ACGTTGGATGTATTAGGGCTAGGACTCCTC | ACGTTGGATGGTGAGTTCTCCTTTTTTGGC | 70  |
| 16271- 16354 | rs16201 | ACGTTGGATGTCAGGCATCATCGAAAACCG | ACGTTGGATGCCCTGCTAATACCAGAAACC | 84  |
| 16447- 16538 | rs16401 | ACGTTGGATGTGTTGGAAGTGAGGACATAC | ACGTTGGATGCCCTGCTAATACCAGAAACC | 92  |

## References

Burger, P. A., Steinborn, R., Walzer, C., Petit, T., Mueller, M., and Schwarzenberger, F. (2004). Analysis of the mitochondrial genome of cheetahs (*Acinonyx jubatus*) with neurodegenerative disease. *Gene*, **338(1):111-119**.

Charruau, P., Fernandes, C., Orozco-Terwengel, P., Peters, J., Hunter, L., Ziaie, H., Jourabchian, A., Jowkar, H., Schaller, G., Ostrowski, S., *et al.* (2011). Phylogeography, genetic structure and population divergence time of cheetahs in Africa and Asia: evidence for long-term geographic isolates. *Molecular Ecology*, **20(4):706-724**.

Freeman, A. R., Machugh, D. E., McKeown, S., Walzer, C., McConnell, D. J., and Bradley, D. G. (2001). Sequence variation in the mitochondrial DNA control region of wild African cheetahs (*Acinonyx jubatus*). *Heredity*, **86(3):355**.

Li, G., Davis, B. W., Eizirik, E., and Murphy, W. J. (2016). Phylogenomic evidence for ancient hybridization in the genomes of living cats (*Felidae*). *Genome Research*, **26(1):1-11**.
